# Supplementary material for: SSGA and MSGA: two seed-growing algorithms for constructing collaborative subnetworks
Source: PubMed Central journal article supplement (PMC5431152; doi:10.1038/s41598-017-01556-z), 2017-05-03
Supplement: 41598_2017_1556_MOESM1_ESM.pdf [file 41598_2017_1556_MOESM1_ESM.pdf]

## **SSGA and MSGA: two seed-growing algorithms for constructing collaborative subnetworks**

Xiaohui Ji<sup>1,2</sup>, Su Chen<sup>2</sup>, Jun Cheng Li<sup>3</sup>, Wenping Deng<sup>4</sup>, Zhigang Wei<sup>2</sup> and Hairong Wei<sup>4,5,6\*</sup>

<sup>1</sup>College of Information and Computer Engineering, <sup>2</sup>State Key Lab of Forest Genetics and Breeding, Northeast Forestry University, Harbin, Heilongjiang 150040, People's Republic of China.

<sup>3</sup>Guangdong Key Laboratory for Innovative Development and Utilization of Forest Plant Germplasm, South China Agricultural University, Guangzhou 510642, People's Republic of China

<sup>4</sup>School of Forest Resources and Environmental Science, Michigan Technological University, Houghton, MI 49931, United States of America. <sup>5</sup>Department of Computer Science, Michigan Technological University, Houghton, MI 49931, United States of America. <sup>6</sup>Life Science and Technology Institute, Michigan Technological University, Houghton, MI 49931, United States of America.

\* Correspondence author: Hairong Wei (hairong@mtu.edu)

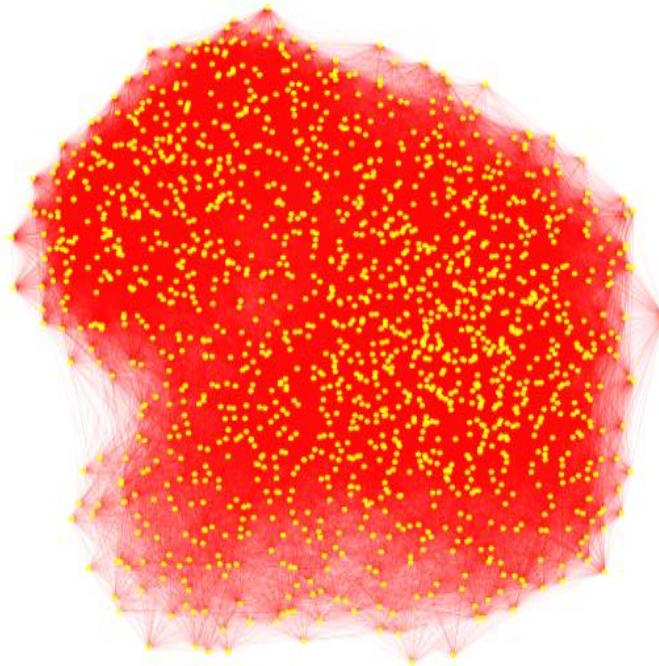

Supplementary Figure 1. The whole collaborative network constructed with Spearman rank correlation for algorithm development. The network was built with 108 normalized microarray chip data described in Nie et al BMC Systems Biology20115:53 DOI: 10.1186/1752-0509-5-53

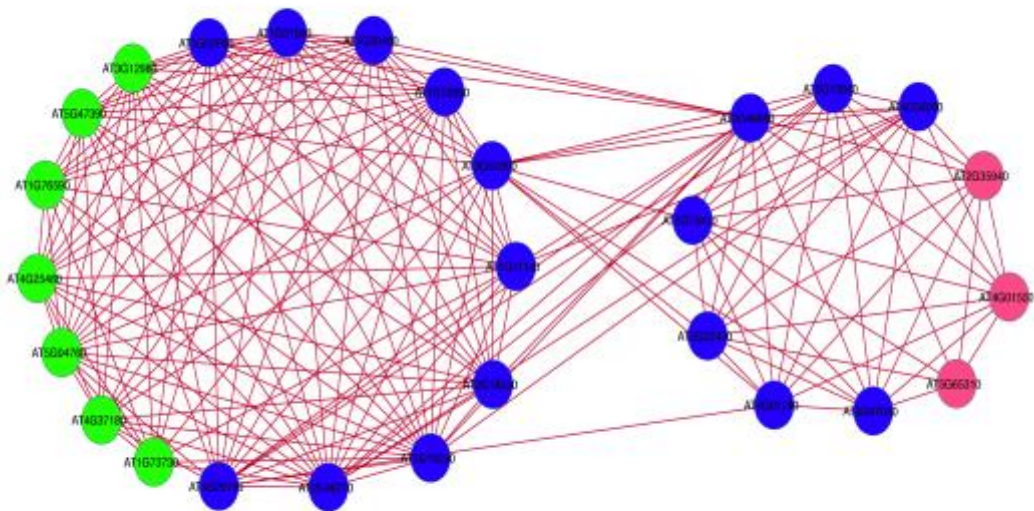

Supplementary Figure 2. Transcription factors (blue nodes) in the Subnetwork 11 derived from Triple-Link algorithm were split into Subnetworks 16 (left) and 18 (right) by SSGA. Green and pink colored nodes are new transcription factors shown up in the Subnetworks 16 and 18 respectively.

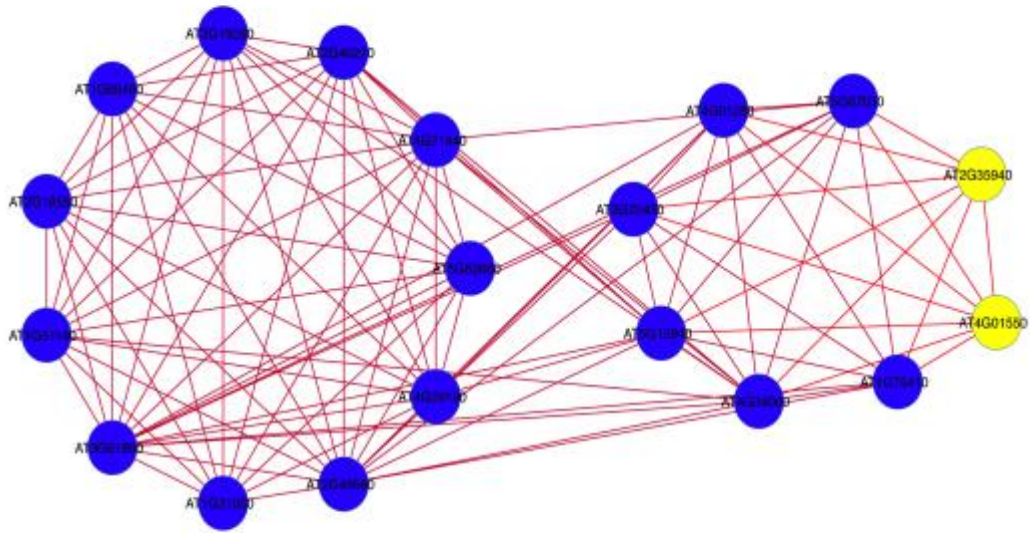

Supplementary Figure 3. Transcription factors (blue nodes) in the Subnetwork 11 derived from Triple-Link algorithm were split into Subnetworks 16 (left) and 8 (right) by MSGA. Yellow colored nodes are new transcription factors shown up in the Subnetwork 8.

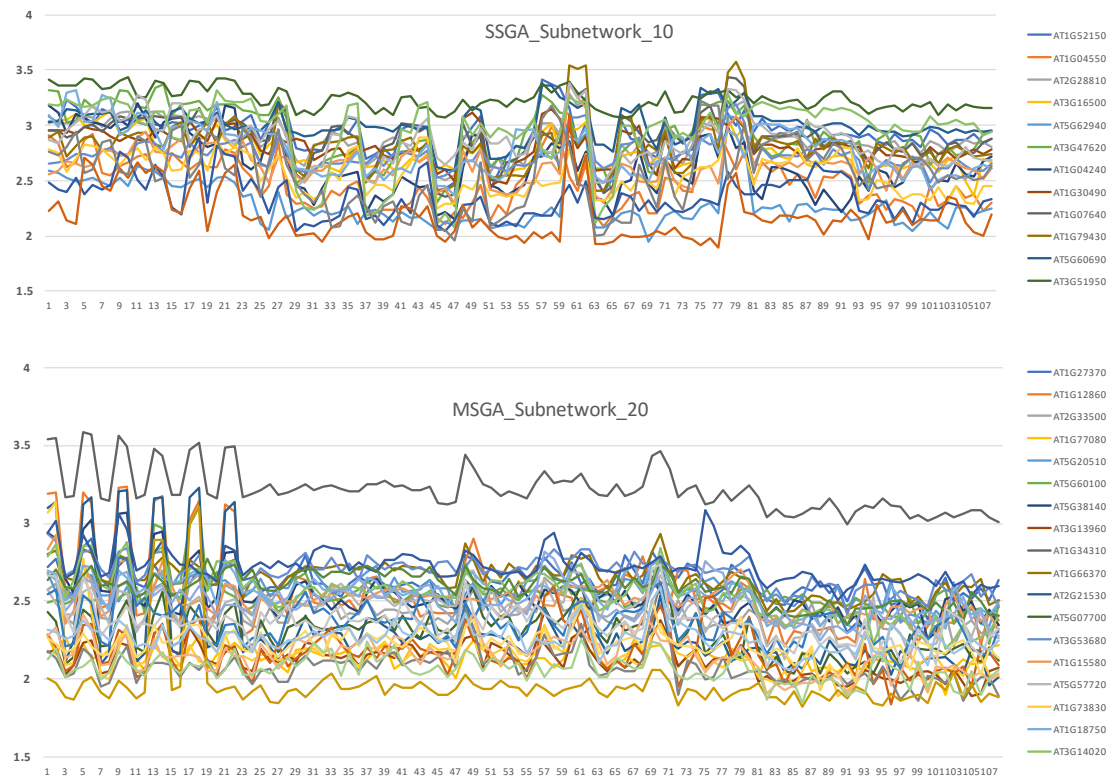

Supplementary Figure 4. The profiles of all genes in two randomly chosen subnetworks, one from SSGA and the other one from MSGA, were shown to display the loosely coordinated TFs within the same subnetworks.

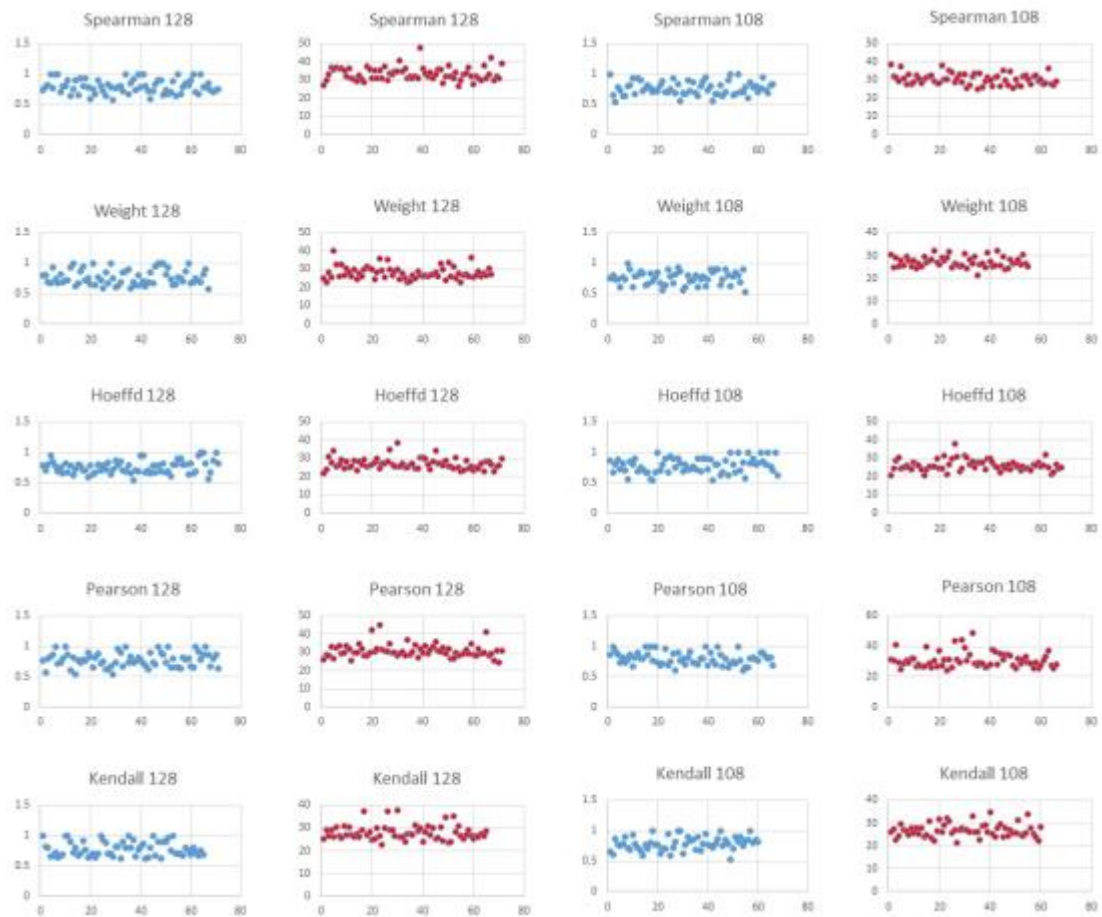

Supplementary Figure 5. The variation of average number of connections per node (blue) and average edge weight (red) within each subnetwork (number of nodes  $\geq 5$ ). Each blue point represents an average number of connections between a subnetwork node and all other intra-subnetwork nodes divided by the number of nodes in the subnetwork. Each Red point represents an average edge weight of all edges within a subnetwork. The collaborative networks for decomposition and construction of subnetworks were constructed through a coexpression analysis between each transcription factor and all genomic genes using Spearman rank correlation, Weighted rank correlation, Hoeffding's D measure, Pearson, or Kendall, which was followed by building shared coordination matrices.





**Supplementary Table 1. The Subnetwork functions of SSGA result.**

| Gene                | Symbol                                                                             | Description                                                     | Evidence |
|---------------------|------------------------------------------------------------------------------------|-----------------------------------------------------------------|----------|
| <b>Subnetwork 1</b> | <b>Function: control the root hair growth</b>                                      |                                                                 |          |
| AT1G27740           | RSL4                                                                               | Postmitotic cell growth in root-hair cells                      | [1]      |
| AT5G58010           | LRL3                                                                               | Roothairless1                                                   | [2]      |
| AT5G19790           | RAP2.11                                                                            | Ethylene response factor controlling root growth                | [3]      |
| AT5G25810           | TINY                                                                               | ERF/AP2 TF control cell expansion in root                       | [4]      |
| AT2G28160           | FRU                                                                                | Regulates iron uptake responses in outer cells of root          | [5]      |
| AT1G66470           | RHD6                                                                               | Early root hair formation                                       | [6]      |
| AT1G57560           | MYB50                                                                              | myb domain protein 50                                           |          |
| AT1G30650           | WRKY14                                                                             | WRKY DNA-binding protein 14                                     | [7]      |
| AT5G60120           | TOE2                                                                               | target of early activation tagged (EAT) 2                       |          |
| <b>Subnetwork 5</b> | <b>Function: control root vascular development, second wall growth development</b> |                                                                 |          |
| AT1G71930           | VND7                                                                               | Regulates xylem vessel formation                                | [8]      |
| AT5G12870           | MYB46                                                                              | Target of SND1, control second wall biosynthesis                | [9]      |
| AT4G28500           | SND2                                                                               | Vascular cell differentiation                                   | [10]     |
| AT4G00220           | LBD30                                                                              | A central regulator of auxin distribution and signaling in root | [11]     |
| AT1G63910           | MYB103                                                                             | Second wall growth                                              | [12]     |
| AT1G12260           | VND4                                                                               | Switches for protoxylem and metaxylem vessel formation          | [13]     |
| AT1G68810           | bHLH                                                                               | Root vascular initial                                           | [14]     |
| AT2G45420           | LBD18                                                                              | Lateral root and tracheary element formation                    | [15]     |
| AT1G66230           | MYB20                                                                              | Second wall growth                                              | [16]     |
| AT1G73410           | MYB54                                                                              | Second wall growth                                              | [16]     |
| AT1G17950           | MYB52                                                                              | Second wall growth                                              | [16]     |
| AT3G21270           | DOF2                                                                               | Early stages of vascular development                            | [17]     |
| AT1G01780           | PLIM2b                                                                             | LIM domain-containing protein                                   |          |
| AT1G80730           | ZFP1                                                                               | zinc-finger protein 1                                           | [18]     |

**Supplementary Table 2. The Subnetwork functions of MSGA result.**

| Gene                | Symbol                                                                               | Description                                             | Evidence |
|---------------------|--------------------------------------------------------------------------------------|---------------------------------------------------------|----------|
| <b>Subnetwork 2</b> | <b>Function: control root cap development and orientation of cell division plane</b> |                                                         |          |
| AT2G37260           | WRKY44                                                                               | Differentiation of trichomes and root hairless cells    | [19]     |
| AT1G74500           | TMO7                                                                                 | Embryonic root initiation                               | [20]     |
| AT2G30340           | LBD13                                                                                | Expressed in cells at the adaxial base of lateral roots | [21]     |
| AT4G31920           | RR10                                                                                 | response regulator 10                                   | [22]     |
| AT2G29060           | ---                                                                                  | scarecrow transcription factor family protein           |          |
| AT5G14750           | WER1                                                                                 | WEREWOLF 1                                              | [23]     |
| AT1G33280           | NAC015                                                                               | BRN1, SMB control root cap maturation                   | [24]     |
| AT4G10350           | NAC070                                                                               | BRN2, SMB control root cap maturation                   | [24]     |
| AT2G40470           | LBD15                                                                                | Expressed in cells at the adaxial base of lateral roots | [21]     |
| AT5G39820           | NAC094                                                                               | Apical meristem protein, function unknown               | [1]      |
| AT1G21340           | ---                                                                                  | Dof-type zinc finger DNA-binding protein                |          |
| AT5G57420           | IAA33                                                                                | IAA is involved in root development                     | [25]     |
| AT1G26870           | FEZ                                                                                  | FEZ and SMB control root stem cells in cap              | [26]     |
| AT1G77200           | ---                                                                                  | DREB subfamily A-4 of ERF/AP2 transcription factor      |          |
| AT1G36060           | ---                                                                                  | Controls Cell Dedifferentiation                         | [27]     |
| AT1G66350           | RGL1                                                                                 | Root epidermal differentiation                          | [28]     |
| AT1G79580           | SMB                                                                                  | FEZ and SMB control root stem cells                     | [24]     |
| <b>Subnetwork 4</b> | <b>Function: control root cell cycle &amp; growth</b>                                |                                                         |          |
| AT2G22840           | GRF1                                                                                 | Growth factor expressed in root                         | [29]     |
| AT4G37740           | GRF2                                                                                 | Growth factor expressed in root                         | [29]     |
| AT2G36400           | GRF3                                                                                 | Growth factor expressed in root                         | [29]     |
| AT3G01330           | E2L2                                                                                 | Cyclin D/retinoblastoma/E2F pathway                     | [30]     |
| AT5G24330           | SDG34                                                                                | Cell cycle regulation of late G1 to S phase             | [31]     |
| AT1G34355           | PS1                                                                                  | Parallel spindle 1 involved in meiosis                  | [32]     |

## SUPPLEMENTARY REFERENCES

1. Yi K, Menand B, Bell E, Dolan L: **A basic helix-loop-helix transcription factor controls cell growth and size in root hairs.** *Nature genetics* 2010, **42**(3):264-U108.
2. Karas B, Amyot L, Johansen C, Sato S, Tabata S, Kawaguchi M, Szczyglowski K: **Conservation of Lotus and Arabidopsis Basic Helix-Loop-Helix Proteins Reveals New Players in Root Hair Development.** *Plant Physiol* 2009, **151**(3):1175-1185.
3. Jung J, Won SY, Suh SC, Kim H, Wing R, Jeong Y, Hwang I, Kim M: **The barley ERF-type transcription factor HvRAF confers enhanced pathogen resistance and salt tolerance in Arabidopsis.** *Planta* 2007, **225**(3):575-588.
4. Wilson K, Long D, Swinburne J, Coupland G: **A dissociation insertion causes a semidominant mutation that increases expression of TINY, an arabidopsis gene related to APETALA2.** *Plant Cell* 1996, **8**(4):659-671.
5. Jakoby M, Wang HY, Reidt W, Weisshaar B, Bauer P: **FRU (BHLH029) is required for induction of iron mobilization genes in Arabidopsis thaliana.** *Febs Lett* 2004, **577**(3):528-534.
6. Menand B, Yi KK, Jouannic S, Hoffmann L, Ryan E, Linstead P, Schaefer DG, Dolan L: **An ancient mechanism controls the development of cells with a rooting function in land plants.** *Science* 2007, **316**(5830):1477-1480.
7. Lee JY, Colinas J, Wang JY, Mace D, Ohler U, Benfey PN: **Transcriptional and posttranscriptional regulation of transcription factor expression in Arabidopsis roots.** *P Natl Acad Sci USA* 2006, **103**(15):6055-6060.
8. Li Z, Omranian N, Neumetzler L, Wang T, Herter T, Usadel B, Demura T, Giavalisco P, Nikoloski Z, Persson S: **A Transcriptional and Metabolic Framework for Secondary Wall Formation in Arabidopsis.** *Plant Physiol* 2016, **172**(2):1334-1351.
9. Zhao Q, Zeng Y, Yin Y, Pu Y, Jackson LA, Engle NL, Martin MZ, Tschaplinski TJ, Ding S-Y, Ragauskas AJ: **Pinoresinol reductase 1 impacts lignin distribution during secondary cell wall biosynthesis in Arabidopsis.** *Phytochemistry* 2015, **112**:170-178.
10. Sakamoto S, Mitsuda N: **Reconstitution of a secondary cell wall in a secondary cell wall-deficient Arabidopsis mutant.** *Plant and Cell Physiology* 2014:pcu208.
11. Bureau M, Rast MI, Illmer J, Simon R: **JAGGED LATERAL ORGAN (JLO) controls auxin dependent patterning during development of the Arabidopsis embryo and root.** *Plant Mol Biol* 2010, **74**(4-5):479-491.
12. Hussey SG, Mizrahi E, Spokevicius AV, Bossinger G, Berger DK, Myburg AA: **SND2, a NAC transcription factor gene, regulates genes involved in secondary cell wall development in Arabidopsis fibres and increases fibre cell area in Eucalyptus.** *Bmc Plant Biol* 2011, **11**.
13. Zhou JL, Zhong RQ, Ye ZH: **Arabidopsis NAC Domain Proteins, VND1 to VND5, Are Transcriptional Regulators of Secondary Wall Biosynthesis in Vessels.** *Plos One* 2014, **9**(8).
14. Ohashi-Ito K, Bergmann DC: **Regulation of the Arabidopsis root vascular initial population by LONESOME HIGHWAY.** *Development* 2007, **134**(16):2959-2968.
15. Lee HW, Kim NY, Lee DJ, Kim J: **LBD18/ASL20 Regulates Lateral Root Formation in Combination with LBD16/ASL18 Downstream of ARF7 and ARF19 in Arabidopsis.** *Plant Physiol* 2009, **151**(3):1377-1389.
16. Zhong RQ, Lee CH, Zhou JL, McCarthy RL, Ye ZH: **A Battery of Transcription Factors Involved in the Regulation of Secondary Cell Wall Biosynthesis in Arabidopsis.** *Plant Cell* 2008, **20**(10):2763-2782.
17. Gardiner J, Sherr I, Scarpella E: **Expression of DOF genes identifies early stages of vascular development in Arabidopsis leaves.** *Int J Dev Biol* 2010, **54**(8-9):1389-1396.
18. Nishii A, Takemura M, Fujita H, Shikata M, Yokota A, Kohchi T: **Characterization of a novel gene encoding a putative single zinc-finger protein, ZIM, expressed**



- during the reproductive phase in *Arabidopsis thaliana*.** *Biosci Biotech Bioch* 2000, **64**(7):1402-1409.
19. Bruex A, Kainkaryam RM, Wieckowski Y, Kang YH, Bernhardt C, Xia Y, Zheng XH, Wang JY, Lee MM, Benfey P *et al*: **A Gene Regulatory Network for Root Epidermis Cell Differentiation in *Arabidopsis*.** *PLoS genetics* 2012, **8**(1).
  20. Schlereth A, Moller B, Liu WL, Kientz M, Flipse J, Rademacher EH, Schmid M, Jurgens G, Weijers D: **MONOPTEROS controls embryonic root initiation by regulating a mobile transcription factor.** *Nature* 2010, **464**(7290):913-U128.
  21. Shuai B, Reynaga-Pena CG, Springer PS: **The LATERAL ORGAN BOUNDARIES gene defines a novel, plant-specific gene family.** *Plant physiology* 2002, **129**(2):747-761.
  22. Street IH, Mathews DE, Yamburkenko MV, Sorooshzadeh A, John RT, Swarup R, Bennett MJ, Kieber JJ, Schaller GE: **Cytokinin acts through the auxin influx carrier AUX1 to regulate cell elongation in the root.** *Development* 2016, **143**(21):3982-3993.
  23. Cheng YW, Zhu WJ, Chen YX, Ito S, Asami T, Wang XL: **Brassinosteroids control root epidermal cell fate via direct regulation of a MYB-bHLH-WD40 complex by GSK3-like kinases.** *eLife* 2014, **3**.
  24. Bennett T, van den Toorn A, Sanchez-Perez GF, Campilho A, Willemsen V, Snel B, Scheres B: **SOMBRERO, BEARSKIN1, and BEARSKIN2 Regulate Root Cap Maturation in *Arabidopsis*.** *Plant Cell* 2010, **22**(3):640-654.
  25. Kares C, Prinsen E, Van Onckelen H, Otten L: **IAA synthesis and root induction with *iaa* genes under heat shock promoter control.** *Plant molecular biology* 1990, **15**(2):225-236.
  26. Willemsen V, Bauch M, Bennett T, Campilho A, Wolkenfelt H, Xu J, Haseloff J, Scheres B: **The NAC Domain Transcription Factors FEZ and SOMBRERO Control the Orientation of Cell Division Plane in *Arabidopsis* Root Stem Cells.** *Dev Cell* 2008, **15**(6):913-922.
  27. Iwase A, Mitsuda N, Koyama T, Hiratsu K, Kojima M, Arai T, Inoue Y, Seki M, Sakakibara H, Sugimoto K: **The AP2/ERF transcription factor WIND1 controls cell dedifferentiation in *Arabidopsis*.** *Curr Biol* 2011, **21**(6):508-514.
  28. Gan Y, Yu H, Peng J, Broun P: **Genetic and molecular regulation by DELLA proteins of trichome development in *Arabidopsis*.** *Plant physiology* 2007, **145**(3):1031-1042.
  29. Liu JY, Rice JH, Chen NN, Baum TJ, Hewezi T: **Synchronization of Developmental Processes and Defense Signaling by Growth Regulating Transcription Factors.** *PLoS One* 2014, **9**(5).
  30. Van Leene J, Hollunder J, Eeckhout D, Persiau G, Van de Slijke E, Stals H, Van Isterdael G, Verkest A, Neiryneck S, Buffel Y *et al*: **Targeted interactomics reveals a complex core cell cycle machinery in *Arabidopsis thaliana*.** *Molecular systems biology* 2010, **6**.
  31. Raynaud C, Sozzani R, Glab N, Domenichini S, Perennes C, Cella R, Kondorosi E, Bergounioux C: **Two cell-cycle regulated SET-domain proteins interact with proliferating cell nuclear antigen (PCNA) in *Arabidopsis*.** *Plant Journal* 2006, **47**(3):395-407.
  32. d'Erfurth I, Jolivet S, Froger N, Catrice O, Novatchkova M, Simon M, Jenczewski E, Mercier R: **Mutations in AtPS1(*Arabidopsis thaliana* Parallel Spindle 1) Lead to the Production of Diploid Pollen Grains.** *PLoS genetics* 2008, **4**(11).
